# Supplementary material for: Main-group metal cyclophane complexes with high coordination numbers
Source: Royal Society of Chemistry journal article supplement (doi:10.1039/d0ra05303a), 2020-01-01

**S1) Total SCF energy (A.U.) and xyz coordinates of D<sub>3</sub> symmetric complexes (except Group 13 *p*Cp-M<sup>+</sup> and *p*Cp-As<sup>3+</sup> complexes which have C<sub>3</sub> symmetry), optimized at PBE0-D3BJ/def2TZVP level.**

*p*Cp-Ga<sup>+</sup>

Energy = -2852.74255678

---

| Atom | X         | Y         | Z         |
|------|-----------|-----------|-----------|
| C    | -2.851054 | -0.683831 | 0.096690  |
| C    | -2.540826 | -0.174113 | -1.163965 |
| C    | -2.174962 | 1.156099  | -1.331745 |
| C    | -2.115866 | 2.041019  | -0.254151 |
| C    | -2.515502 | 1.554476  | 0.991437  |
| C    | -2.869741 | 0.220249  | 1.161709  |
| H    | -2.548681 | -0.827774 | -2.028397 |
| H    | -1.909111 | 1.508908  | -2.322350 |
| H    | -2.520986 | 2.215865  | 1.851498  |
| H    | -3.136101 | -0.134225 | 2.151949  |
| C    | -1.605073 | 3.443793  | -0.437545 |
| H    | -1.463212 | 3.628937  | -1.504643 |
| H    | -2.365363 | 4.157674  | -0.107996 |
| C    | -0.307339 | 3.766045  | 0.325409  |
| H    | 0.000000  | 4.779270  | 0.046168  |

|   |           |           |           |
|---|-----------|-----------|-----------|
| H | -0.514614 | 3.802291  | 1.397951  |
| C | 0.833312  | 2.811000  | 0.096690  |
| C | 1.119626  | 2.287476  | -1.163965 |
| C | 1.625612  | 2.375145  | 1.161709  |
| C | 2.088692  | 1.305523  | -1.331745 |
| H | 0.557467  | 2.621110  | -2.028397 |
| C | 2.603966  | 1.401251  | 0.991437  |
| H | 1.451808  | 2.783056  | 2.151949  |
| C | 2.825507  | 0.811884  | -0.254151 |
| H | 2.261308  | 0.898884  | -2.322350 |
| H | 3.179488  | 1.075305  | 1.851498  |
| C | 3.784949  | -0.331863 | -0.437545 |
| H | 4.783333  | -0.030373 | -0.107996 |
| H | 3.874358  | -0.547290 | -1.504643 |
| C | 3.415160  | -1.616859 | 0.325409  |
| H | 4.138969  | -2.389635 | 0.046168  |
| H | 3.550188  | -1.455477 | 1.397951  |
| C | -3.107821 | -2.149185 | 0.325409  |
| H | -3.035574 | -2.346814 | 1.397951  |
| H | -4.138969 | -2.389635 | 0.046168  |
| C | -2.179876 | -3.111930 | -0.437545 |
| H | -2.417970 | -4.127301 | -0.107996 |
| H | -2.411146 | -3.081647 | -1.504643 |

|    |           |           |           |
|----|-----------|-----------|-----------|
| C  | -0.709641 | -2.852903 | -0.254151 |
| C  | -0.088465 | -2.955726 | 0.991437  |
| C  | 0.086270  | -2.461622 | -1.331745 |
| C  | 1.244130  | -2.595393 | 1.161709  |
| H  | -0.658502 | -3.291170 | 1.851498  |
| C  | 1.421199  | -2.113363 | -1.163965 |
| H  | -0.352198 | -2.407793 | -2.322350 |
| C  | 2.017742  | -2.127169 | 0.096690  |
| H  | 1.684293  | -2.648831 | 2.151949  |
| H  | 1.991214  | -1.793336 | -2.028397 |
| Ga | 0.000000  | 0.000000  | 0.405366  |

-----

*p*Cp-In<sup>+</sup>

Energy = -1118.29403846

-----

| Atom | X        | Y        | Z         |
|------|----------|----------|-----------|
| C    | 0.000000 | 2.957441 | -0.109744 |
| C    | 0.361981 | 2.397113 | -1.333152 |
| C    | 1.572949 | 1.740304 | -1.496336 |
| C    | 2.489003 | 1.615905 | -0.452274 |
| C    | 2.184529 | 2.284584 | 0.735971  |

-----

|   |           |           |           |
|---|-----------|-----------|-----------|
| C | 0.965516  | 2.939046  | 0.902451  |
| H | -0.320581 | 2.446381  | -2.171595 |
| H | 1.802346  | 1.299801  | -2.459810 |
| H | 2.894119  | 2.272933  | 1.557190  |
| H | 0.746184  | 3.413907  | 1.853657  |
| C | 3.730035  | 0.778713  | -0.617293 |
| H | 3.891887  | 0.599533  | -1.682826 |
| H | 4.600975  | 1.343212  | -0.273587 |
| C | 3.734623  | -0.565122 | 0.139103  |
| H | 4.664028  | -1.083799 | -0.119674 |
| H | 3.794750  | -0.372917 | 1.214384  |
| C | 2.561219  | -1.478720 | -0.109744 |
| C | 1.894970  | -1.512041 | -1.333152 |
| C | 2.062530  | -2.305684 | 0.902451  |
| C | 0.720673  | -2.232366 | -1.496336 |
| H | 2.278919  | -0.945559 | -2.171595 |
| C | 0.886243  | -3.034150 | 0.735971  |
| H | 2.583438  | -2.353168 | 1.853657  |
| C | 0.154913  | -2.963492 | -0.452274 |
| H | 0.224488  | -2.210778 | -2.459810 |
| H | 0.521358  | -3.642847 | 1.557190  |
| C | -1.190632 | -3.619661 | -0.617293 |
| H | -1.137232 | -4.656167 | -0.273587 |

|    |           |           |           |
|----|-----------|-----------|-----------|
| H  | -1.426733 | -3.670239 | -1.682826 |
| C  | -2.356721 | -2.951717 | 0.139103  |
| H  | -3.270612 | -3.497267 | -0.119674 |
| H  | -2.220330 | -3.099892 | 1.214384  |
| C  | -1.377901 | 3.516839  | 0.139103  |
| H  | -1.574420 | 3.472808  | 1.214384  |
| H  | -1.393416 | 4.581066  | -0.119674 |
| C  | -2.539403 | 2.840948  | -0.617293 |
| H  | -3.463743 | 3.312955  | -0.273587 |
| H  | -2.465154 | 3.070707  | -1.682826 |
| C  | -2.643916 | 1.347587  | -0.452274 |
| C  | -3.070772 | 0.749566  | 0.735971  |
| C  | -2.293622 | 0.492062  | -1.496336 |
| C  | -3.028046 | -0.633362 | 0.902451  |
| H  | -3.415477 | 1.369915  | 1.557190  |
| C  | -2.256951 | -0.885071 | -1.333152 |
| H  | -2.026834 | 0.910977  | -2.459810 |
| C  | -2.561219 | -1.478720 | -0.109744 |
| H  | -3.329622 | -1.060739 | 1.853657  |
| H  | -1.958338 | -1.500822 | -2.171595 |
| In | 0.000000  | 0.000000  | 0.947137  |

---

*p*Cp-Tl<sup>+</sup>

Energy = -1100.67990157

---

| Atom | X         | Y         | Z         |
|------|-----------|-----------|-----------|
| C    | -2.918196 | -0.443227 | -0.283240 |
| C    | -2.412028 | -0.003140 | -1.504043 |
| C    | -1.947053 | 1.292854  | -1.668073 |
| C    | -1.968448 | 2.219294  | -0.626734 |
| C    | -2.588208 | 1.819828  | 0.559583  |
| C    | -3.051799 | 0.515671  | 0.726483  |
| H    | -2.355720 | -0.686075 | -2.341541 |
| H    | -1.544406 | 1.584993  | -2.631014 |
| H    | -2.692950 | 2.526621  | 1.376852  |
| H    | -3.499448 | 0.230469  | 1.673715  |
| H    | -1.328839 | 3.572408  | -0.791789 |
| H    | -1.176344 | 3.759772  | -1.857307 |
| H    | -2.017102 | 4.348808  | -0.447112 |
| C    | 0.000000  | 3.776699  | -0.036705 |
| H    | 0.376876  | 4.771219  | -0.298840 |
| H    | -0.198732 | 3.812498  | 1.038628  |
| C    | 1.075253  | 2.748845  | -0.283240 |
| C    | 1.203294  | 2.090447  | -1.504043 |

|   |           |           |           |
|---|-----------|-----------|-----------|
| C | 1.972483  | 2.385100  | 0.726483  |
| C | 2.093171  | 1.039770  | -1.668073 |
| H | 0.583701  | 2.383151  | -2.341541 |
| C | 2.870122  | 1.331540  | 0.559583  |
| H | 1.949316  | 2.915376  | 1.673715  |
| C | 2.906189  | 0.595079  | -0.626734 |
| H | 2.144847  | 0.544998  | -2.631014 |
| H | 3.534594  | 1.068853  | 1.376852  |
| C | 3.758216  | -0.635396 | -0.791789 |
| H | 4.774729  | -0.427542 | -0.447112 |
| H | 3.844230  | -0.861142 | -1.857307 |
| C | 3.270717  | -1.888349 | -0.036705 |
| H | 3.943558  | -2.711994 | -0.298840 |
| H | 3.401086  | -1.734142 | 1.038628  |
| C | -3.270717 | -1.888349 | -0.036705 |
| H | -3.202354 | -2.078356 | 1.038628  |
| H | -4.320435 | -2.059225 | -0.298840 |
| C | -2.429377 | -2.937013 | -0.791789 |
| H | -2.757627 | -3.921265 | -0.447112 |
| H | -2.667886 | -2.898630 | -1.857307 |
| C | -0.937741 | -2.814373 | -0.626734 |
| C | -0.281913 | -3.151368 | 0.559583  |
| C | -0.146118 | -2.332624 | -1.668073 |

|    |           |           |           |
|----|-----------|-----------|-----------|
| C  | 1.079316  | -2.900771 | 0.726483  |
| H  | -0.841643 | -3.595474 | 1.376852  |
| C  | 1.208733  | -2.087307 | -1.504043 |
| H  | -0.600441 | -2.129991 | -2.631014 |
| C  | 1.842944  | -2.305619 | -0.283240 |
| H  | 1.550132  | -3.145846 | 1.673715  |
| H  | 1.772018  | -1.697075 | -2.341541 |
| Tl | 0.000000  | 0.000000  | 0.934582  |

---

*p*Cp-Ge<sup>2+</sup>

Energy = -3004.50389051

---

| Atom | X         | Y         | Z         |
|------|-----------|-----------|-----------|
| C    | -2.857403 | 0.018335  | 0.177850  |
| C    | -2.566073 | 0.508057  | -1.099192 |
| C    | -1.867184 | 1.702270  | -1.271903 |
| C    | -1.444580 | 2.465416  | -0.177850 |
| C    | -1.723026 | 1.968256  | 1.099192  |
| C    | -2.407801 | 0.765894  | 1.271903  |
| H    | -2.891949 | -0.040868 | -1.975977 |
| H    | -1.663141 | 2.055365  | -2.277175 |



|   |           |           |           |
|---|-----------|-----------|-----------|
| H | -1.410582 | 2.524935  | 1.975977  |
| H | -2.611569 | 0.412640  | 2.277175  |
| C | -0.673328 | 3.733544  | -0.371627 |
| H | -0.520031 | 3.901411  | -1.439130 |
| H | -1.264743 | 4.581154  | -0.013529 |
| C | 0.673328  | 3.733544  | 0.371627  |
| H | 1.264743  | 4.581154  | 0.013529  |
| H | 0.520031  | 3.901411  | 1.439130  |
| C | 1.444580  | 2.465416  | 0.177850  |
| C | 1.723026  | 1.968256  | -1.099192 |
| C | 1.867184  | 1.702270  | 1.271903  |
| C | 2.407801  | 0.765894  | -1.271903 |
| H | 1.410582  | 2.524935  | -1.975977 |
| C | 2.566073  | 0.508057  | 1.099192  |
| H | 1.663141  | 2.055365  | 2.277175  |
| C | 2.857403  | 0.018335  | -0.177850 |
| H | 2.611569  | 0.412640  | -2.277175 |
| H | 2.891949  | -0.040868 | 1.975977  |
| C | 3.570008  | -1.283653 | -0.371627 |
| H | 4.599767  | -1.195278 | -0.013529 |
| H | 3.638737  | -1.500345 | -1.439130 |
| C | 2.896680  | -2.449892 | 0.371627  |
| H | 3.335025  | -3.385876 | 0.013529  |

|    |           |           |           |
|----|-----------|-----------|-----------|
| H  | 3.118705  | -2.401066 | 1.439130  |
| C  | -3.570008 | -1.283653 | 0.371627  |
| H  | -3.638737 | -1.500345 | 1.439130  |
| H  | -4.599767 | -1.195278 | 0.013529  |
| C  | -2.896680 | -2.449892 | -0.371627 |
| H  | -3.335025 | -3.385876 | -0.013529 |
| H  | -3.118705 | -2.401066 | -1.439130 |
| C  | -1.412823 | -2.483751 | -0.177850 |
| C  | -0.843046 | -2.476313 | 1.099192  |
| C  | -0.540617 | -2.468164 | -1.271903 |
| C  | 0.540617  | -2.468164 | 1.271903  |
| H  | -1.481367 | -2.484067 | 1.975977  |
| C  | 0.843046  | -2.476313 | -1.099192 |
| H  | -0.948428 | -2.468005 | -2.277175 |
| C  | 1.412823  | -2.483751 | 0.177850  |
| H  | 0.948428  | -2.468005 | 2.277175  |
| H  | 1.481367  | -2.484067 | -1.975977 |
| Ge | 0.000000  | 0.000000  | 0.000000  |

-----

*p*Cp-Sn<sup>2+</sup>

Energy = -1142.11431938

-----

| Atom | X         | Y        | Z         |
|------|-----------|----------|-----------|
| C    | -2.938683 | 0.056643 | 0.174466  |
| C    | -2.686870 | 0.578097 | -1.101220 |
| C    | -1.987293 | 1.775463 | -1.269354 |
| C    | -1.518396 | 2.516653 | -0.174466 |
| C    | -1.844081 | 2.037849 | 1.101220  |
| C    | -2.531242 | 0.833315 | 1.269354  |
| H    | -3.021594 | 0.039182 | -1.981273 |
| H    | -1.794609 | 2.135868 | -2.274565 |
| H    | -1.544729 | 2.597186 | 1.981273  |
| H    | -2.747021 | 0.486243 | 2.274565  |
| C    | -0.672708 | 3.742972 | -0.377411 |
| H    | -0.501734 | 3.878002 | -1.447316 |
| H    | -1.231546 | 4.625300 | -0.051112 |
| C    | 0.672708  | 3.742972 | 0.377411  |
| H    | 1.231546  | 4.625300 | 0.051112  |
| H    | 0.501734  | 3.878002 | 1.447316  |
| C    | 1.518396  | 2.516653 | 0.174466  |
| C    | 1.844081  | 2.037849 | -1.101220 |
| C    | 1.987293  | 1.775463 | 1.269354  |
| C    | 2.531242  | 0.833315 | -1.269354 |
| H    | 1.544729  | 2.597186 | -1.981273 |

|   |           |           |           |
|---|-----------|-----------|-----------|
| C | 2.686870  | 0.578097  | 1.101220  |
| H | 1.794609  | 2.135868  | 2.274565  |
| C | 2.938683  | 0.056643  | -0.174466 |
| H | 2.747021  | 0.486243  | -2.274565 |
| H | 3.021594  | 0.039182  | 1.981273  |
| C | 3.577863  | -1.288904 | -0.377411 |
| H | 4.621401  | -1.246100 | -0.051112 |
| H | 3.609315  | -1.504487 | -1.447316 |
| C | 2.905155  | -2.454068 | 0.377411  |
| H | 3.389855  | -3.379200 | 0.051112  |
| H | 3.107581  | -2.373516 | 1.447316  |
| C | -3.577863 | -1.288904 | 0.377411  |
| H | -3.609315 | -1.504487 | 1.447316  |
| H | -4.621401 | -1.246100 | 0.051112  |
| C | -2.905155 | -2.454068 | -0.377411 |
| H | -3.389855 | -3.379200 | -0.051112 |
| H | -3.107581 | -2.373516 | -1.447316 |
| C | -1.420287 | -2.573296 | -0.174466 |
| C | -0.842788 | -2.615946 | 1.101220  |
| C | -0.543949 | -2.608778 | -1.269354 |
| C | 0.543949  | -2.608778 | 1.269354  |
| H | -1.476864 | -2.636368 | 1.981273  |
| C | 0.842788  | -2.615946 | -1.101220 |

|    |           |           |           |
|----|-----------|-----------|-----------|
| H  | -0.952412 | -2.622111 | -2.274565 |
| C  | 1.420287  | -2.573296 | 0.174466  |
| H  | 0.952412  | -2.622111 | 2.274565  |
| H  | 1.476864  | -2.636368 | -1.981273 |
| Sn | 0.000000  | 0.000000  | 0.000000  |

---

*p*Cp-Pb<sup>2+</sup>

Energy = -1120.69712240

---

| Atom | X         | Y        | Z         |
|------|-----------|----------|-----------|
| C    | -2.942398 | 0.058837 | 0.174057  |
| C    | -2.692303 | 0.581828 | -1.101312 |
| C    | -1.993389 | 1.779397 | -1.269018 |
| C    | -1.522154 | 2.518773 | -0.174057 |
| C    | -1.850030 | 2.040689 | 1.101312  |
| C    | -2.537697 | 0.836628 | 1.269018  |
| H    | -3.029242 | 0.044270 | -1.981497 |
| H    | -1.803443 | 2.141921 | -2.274119 |
| H    | -1.552960 | 2.601266 | 1.981497  |
| H    | -2.756680 | 0.490867 | 2.274119  |
| C    | -0.673105 | 3.743609 | -0.377089 |

|   |           |           |           |
|---|-----------|-----------|-----------|
| H | -0.502090 | 3.877708  | -1.447154 |
| H | -1.230218 | 4.627255  | -0.051479 |
| C | 0.673105  | 3.743609  | 0.377089  |
| H | 1.230218  | 4.627255  | 0.051479  |
| H | 0.502090  | 3.877708  | 1.447154  |
| C | 1.522154  | 2.518773  | 0.174057  |
| C | 1.850030  | 2.040689  | -1.101312 |
| C | 1.993389  | 1.779397  | 1.269018  |
| C | 2.537697  | 0.836628  | -1.269018 |
| H | 1.552960  | 2.601266  | -1.981497 |
| C | 2.692303  | 0.581828  | 1.101312  |
| H | 1.803443  | 2.141921  | 2.274119  |
| C | 2.942398  | 0.058837  | -0.174057 |
| H | 2.756680  | 0.490867  | -2.274119 |
| H | 3.029242  | 0.044270  | 1.981497  |
| C | 3.578613  | -1.288879 | -0.377089 |
| H | 4.622430  | -1.248227 | -0.051479 |
| H | 3.609239  | -1.504031 | -1.447154 |
| C | 2.905508  | -2.454731 | 0.377089  |
| H | 3.392211  | -3.379028 | 0.051479  |
| H | 3.107148  | -2.373677 | 1.447154  |
| C | -3.578613 | -1.288879 | 0.377089  |
| H | -3.609239 | -1.504031 | 1.447154  |

|    |           |           |           |
|----|-----------|-----------|-----------|
| H  | -4.622430 | -1.248227 | 0.051479  |
| C  | -2.905508 | -2.454731 | -0.377089 |
| H  | -3.392211 | -3.379028 | -0.051479 |
| H  | -3.107148 | -2.373677 | -1.447154 |
| C  | -1.420244 | -2.577610 | -0.174057 |
| C  | -0.842274 | -2.622517 | 1.101312  |
| C  | -0.544308 | -2.616024 | -1.269018 |
| C  | 0.544308  | -2.616024 | 1.269018  |
| H  | -1.476282 | -2.645535 | 1.981497  |
| C  | 0.842274  | -2.622517 | -1.101312 |
| H  | -0.953237 | -2.632788 | -2.274119 |
| C  | 1.420244  | -2.577610 | 0.174057  |
| H  | 0.953237  | -2.632788 | 2.274119  |
| H  | 1.476282  | -2.645535 | -1.981497 |
| Pb | 0.000000  | 0.000000  | 0.000000  |

-----

*p*Cp-As<sup>3+</sup>

Energy = -3162.78300725

-----

| Atom | X         | Y         | Z        |
|------|-----------|-----------|----------|
| C    | -2.767277 | -0.755010 | 0.131000 |

-----

|   |           |           |           |
|---|-----------|-----------|-----------|
| C | -2.890240 | -0.121927 | -1.103971 |
| C | -2.522514 | 1.213501  | -1.281212 |
| C | -2.051058 | 2.002211  | -0.226169 |
| C | -1.941655 | 1.387927  | 1.029067  |
| C | -2.249075 | 0.014121  | 1.199650  |
| H | -3.293834 | -0.668967 | -1.950303 |
| H | -2.629434 | 1.658900  | -2.265694 |
| H | -1.653371 | 1.962951  | 1.901935  |
| H | -2.221860 | -0.403155 | 2.201960  |
| C | -1.642457 | 3.423445  | -0.427491 |
| H | -1.541294 | 3.623973  | -1.495729 |
| H | -2.437494 | 4.087442  | -0.068897 |
| C | -0.343730 | 3.791354  | 0.321884  |
| H | 0.000000  | 4.756879  | -0.061365 |
| H | -0.535864 | 3.940157  | 1.385921  |
| C | 0.729781  | 2.774037  | 0.131000  |
| C | 1.339529  | 2.563985  | -1.103971 |
| C | 1.136767  | 1.940696  | 1.199650  |
| C | 2.312179  | 1.577811  | -1.281212 |
| H | 1.067574  | 3.187027  | -1.950303 |
| C | 2.172807  | 0.987559  | 1.029067  |
| H | 0.761788  | 2.125765  | 2.201960  |
| C | 2.759495  | 0.775163  | -0.226169 |



|   |           |           |           |
|---|-----------|-----------|-----------|
| H | 2.751367  | 1.447706  | -2.265694 |
| H | 2.526651  | 0.450386  | 1.901935  |
| C | 3.786019  | -0.289313 | -0.427491 |
| H | 4.758576  | 0.067211  | -0.068897 |
| H | 3.909099  | -0.477186 | -1.495729 |
| C | 3.455274  | -1.597998 | 0.321884  |
| H | 4.119578  | -2.378439 | -0.061365 |
| H | 3.680209  | -1.506007 | 1.385921  |
| C | -3.111544 | -2.193356 | 0.321884  |
| H | -3.144344 | -2.434151 | 1.385921  |
| H | -4.119578 | -2.378439 | -0.061365 |
| C | -2.143562 | -3.134132 | -0.427491 |
| H | -2.321082 | -4.154653 | -0.068897 |
| H | -2.367805 | -3.146786 | -1.495729 |
| C | -0.708437 | -2.777374 | -0.226169 |
| C | -0.231153 | -2.375486 | 1.029067  |
| C | 0.210335  | -2.791311 | -1.281212 |
| C | 1.112309  | -1.954817 | 1.199650  |
| H | -0.873280 | -2.413337 | 1.901935  |
| C | 1.550712  | -2.442058 | -1.103971 |
| H | -0.121933 | -3.106607 | -2.265694 |
| C | 2.037497  | -2.019027 | 0.131000  |
| H | 1.460073  | -1.722610 | 2.201960  |

|    |          |           |           |
|----|----------|-----------|-----------|
| H  | 2.226259 | -2.518060 | -1.950303 |
| As | 0.000000 | 0.000000  | 0.226874  |

-----

*p*Cp-Sb<sup>3+</sup>

Energy = -1167.51065110

-----

| Atom |   | X         | Y         | Z         |
|------|---|-----------|-----------|-----------|
| C    | 0 | -2.878952 | 0.018540  | 0.176278  |
| C    | 0 | -2.588024 | 0.518025  | -1.104518 |
| C    | 0 | -1.884918 | 1.718090  | -1.275606 |
| C    | 0 | -1.455532 | 2.483976  | -0.176278 |
| C    | 0 | -1.742635 | 1.982282  | 1.104518  |
| C    | 0 | -2.430368 | 0.773342  | 1.275606  |
| H    | 0 | -2.921313 | -0.022048 | -1.985291 |
| H    | 0 | -1.691035 | 2.075503  | -2.282488 |
| H    | 0 | -1.441563 | 2.540956  | 1.985291  |
| H    | 0 | -2.642955 | 0.426728  | 2.282488  |
| C    | 0 | -0.678522 | 3.745521  | -0.368967 |
| H    | 0 | -0.539547 | 3.929532  | -1.435543 |
| H    | 0 | -1.263427 | 4.590683  | 0.009161  |
| C    | 0 | 0.678522  | 3.745521  | 0.368967  |

|   |   |           |           |           |
|---|---|-----------|-----------|-----------|
| H | 0 | 1.263427  | 4.590683  | -0.009161 |
| H | 0 | 0.539547  | 3.929532  | 1.435543  |
| C | 0 | 1.455532  | 2.483976  | 0.176278  |
| C | 0 | 1.742635  | 1.982282  | -1.104518 |
| C | 0 | 1.884918  | 1.718090  | 1.275606  |
| C | 0 | 2.430368  | 0.773342  | -1.275606 |
| H | 0 | 1.441563  | 2.540956  | -1.985291 |
| C | 0 | 2.588024  | 0.518025  | 1.104518  |
| H | 0 | 1.691035  | 2.075503  | 2.282488  |
| C | 0 | 2.878952  | 0.018540  | -0.176278 |
| H | 0 | 2.642955  | 0.426728  | -2.282488 |
| H | 0 | 2.921313  | -0.022048 | 1.985291  |
| C | 0 | 3.582977  | -1.285143 | -0.368967 |
| H | 0 | 4.607362  | -1.201182 | 0.009161  |
| H | 0 | 3.672848  | -1.497504 | -1.435543 |
| C | 0 | 2.904455  | -2.460378 | 0.368967  |
| H | 0 | 3.343935  | -3.389501 | -0.009161 |
| H | 0 | 3.133301  | -2.432027 | 1.435543  |
| C | 0 | -3.582977 | -1.285143 | 0.368967  |
| H | 0 | -3.672848 | -1.497504 | 1.435543  |
| H | 0 | -4.607362 | -1.201182 | -0.009161 |
| C | 0 | -2.904455 | -2.460378 | -0.368967 |
| H | 0 | -3.343935 | -3.389501 | 0.009161  |

|    |   |           |           |           |
|----|---|-----------|-----------|-----------|
| H  | 0 | -3.133301 | -2.432027 | -1.435543 |
| C  | 0 | -1.423420 | -2.502516 | -0.176278 |
| C  | 0 | -0.845390 | -2.500307 | 1.104518  |
| C  | 0 | -0.545450 | -2.491432 | -1.275606 |
| C  | 0 | 0.545450  | -2.491432 | 1.275606  |
| H  | 0 | -1.479751 | -2.518908 | 1.985291  |
| C  | 0 | 0.845390  | -2.500307 | -1.104518 |
| H  | 0 | -0.951921 | -2.502230 | -2.282488 |
| C  | 0 | 1.423420  | -2.502516 | 0.176278  |
| H  | 0 | 0.951921  | -2.502230 | 2.282488  |
| H  | 0 | 1.479751  | -2.518908 | -1.985291 |
| Sb | 0 | 0.000000  | 0.000000  | 0.000000  |

-----

*p*Cp-Bi<sup>3+</sup>

Energy = -1141.91848668

-----

| Atom | X | Y | Z |
|------|---|---|---|
|------|---|---|---|

-----

|   |           |          |           |
|---|-----------|----------|-----------|
| C | -2.903405 | 0.029732 | 0.175073  |
| C | -2.626148 | 0.540373 | -1.105389 |
| C | -1.923465 | 1.741786 | -1.274891 |
| C | -1.477451 | 2.499556 | -0.175073 |

|   |           |           |           |
|---|-----------|-----------|-----------|
| C | -1.781050 | 2.004124  | 1.105389  |
| C | -2.470163 | 0.794877  | 1.274891  |
| H | -2.966364 | 0.005713  | -1.987012 |
| H | -1.737782 | 2.104644  | -2.281516 |
| H | -1.488130 | 2.566090  | 1.987012  |
| H | -2.691566 | 0.452641  | 2.281516  |
| C | -0.678164 | 3.749958  | -0.370458 |
| H | -0.533402 | 3.923520  | -1.438181 |
| H | -1.254463 | 4.605672  | -0.003101 |
| C | 0.678164  | 3.749958  | 0.370458  |
| H | 1.254463  | 4.605672  | 0.003101  |
| H | 0.533402  | 3.923520  | 1.438181  |
| C | 1.477451  | 2.499556  | 0.175073  |
| C | 1.781050  | 2.004124  | -1.105389 |
| C | 1.923465  | 1.741786  | 1.274891  |
| C | 2.470163  | 0.794877  | -1.274891 |
| H | 1.488130  | 2.566090  | -1.987012 |
| C | 2.626148  | 0.540373  | 1.105389  |
| H | 1.737782  | 2.104644  | 2.281516  |
| C | 2.903405  | 0.029732  | -0.175073 |
| H | 2.691566  | 0.452641  | -2.281516 |
| H | 2.966364  | 0.005713  | 1.987012  |
| C | 3.586641  | -1.287671 | -0.370458 |

|    |           |           |           |
|----|-----------|-----------|-----------|
| H  | 4.615860  | -1.216439 | -0.003101 |
| H  | 3.664569  | -1.499820 | -1.438181 |
| C  | 2.908476  | -2.462286 | 0.370458  |
| H  | 3.361397  | -3.389233 | 0.003101  |
| H  | 3.131167  | -2.423700 | 1.438181  |
| C  | -3.586641 | -1.287671 | 0.370458  |
| H  | -3.664569 | -1.499820 | 1.438181  |
| H  | -4.615860 | -1.216439 | 0.003101  |
| C  | -2.908476 | -2.462286 | -0.370458 |
| H  | -3.361397 | -3.389233 | -0.003101 |
| H  | -3.131167 | -2.423700 | -1.438181 |
| C  | -1.425953 | -2.529288 | -0.175073 |
| C  | -0.845097 | -2.544497 | 1.105389  |
| C  | -0.546698 | -2.536662 | -1.274891 |
| C  | 0.546698  | -2.536662 | 1.274891  |
| H  | -1.478234 | -2.571804 | 1.987012  |
| C  | 0.845097  | -2.544497 | -1.105389 |
| H  | -0.953784 | -2.557285 | -2.281516 |
| C  | 1.425953  | -2.529288 | 0.175073  |
| H  | 0.953784  | -2.557285 | 2.281516  |
| H  | 1.478234  | -2.571804 | -1.987012 |
| Bi | 0.000000  | 0.000000  | 0.000000  |

---

Dp-Ga<sup>+</sup>

Energy = -3084.83025296

---

| Atom | X         | Y         | Z         |
|------|-----------|-----------|-----------|
| C    | 1.276424  | 2.474759  | 0.618141  |
| C    | 1.181264  | 2.428287  | -0.781570 |
| C    | -0.092970 | 2.498414  | -1.359776 |
| C    | -1.276424 | 2.474759  | -0.618141 |
| C    | -1.181264 | 2.428287  | 0.781570  |
| C    | 0.092970  | 2.498414  | 1.359776  |
| C    | 2.693590  | -0.191139 | 0.781570  |
| C    | 2.781416  | -0.131964 | -0.618141 |
| C    | 2.210175  | -1.168693 | -1.359776 |
| C    | 1.512326  | -2.237148 | -0.781570 |
| C    | 1.504992  | -2.342796 | 0.618141  |
| C    | 2.117205  | -1.329721 | 1.359776  |
| C    | -1.512326 | -2.237148 | 0.781570  |
| C    | -1.504992 | -2.342796 | -0.618141 |
| C    | -2.117205 | -1.329721 | -1.359776 |
| C    | -2.693590 | -0.191139 | -0.781570 |
| C    | -2.781416 | -0.131964 | 0.618141  |

|   |           |           |           |
|---|-----------|-----------|-----------|
| C | -2.210175 | -1.168693 | 1.359776  |
| C | 0.757335  | -3.454559 | 1.302816  |
| C | -0.730458 | -3.172278 | 1.670245  |
| C | 0.730458  | -3.172278 | -1.670245 |
| C | -0.757335 | -3.454559 | -1.302816 |
| C | -3.112502 | 0.953544  | -1.670245 |
| C | -2.613068 | 2.383151  | -1.302816 |
| C | -3.370403 | 1.071408  | 1.302816  |
| C | -2.382044 | 2.218734  | 1.670245  |
| C | 3.370403  | 1.071408  | -1.302816 |
| C | 2.382044  | 2.218734  | -1.670245 |
| C | 3.112502  | 0.953544  | 1.670245  |
| C | 2.613068  | 2.383151  | 1.302816  |
| H | -0.166220 | 2.487119  | -2.443708 |
| H | 0.166220  | 2.487119  | 2.443708  |
| H | 2.237018  | -1.099609 | -2.443708 |
| H | 2.070798  | -1.387510 | 2.443708  |
| H | -2.070798 | -1.387510 | -2.443708 |
| H | -2.237018 | -1.099609 | 2.443708  |
| H | 0.817794  | -4.348461 | 0.681733  |
| H | 1.271830  | -3.704912 | 2.233075  |
| H | -0.761504 | -2.758733 | 2.680180  |
| H | -1.240928 | -4.139339 | 1.730009  |



|    |           |           |           |
|----|-----------|-----------|-----------|
| H  | 1.240928  | -4.139339 | -1.730009 |
| H  | 0.761504  | -2.758733 | -2.680180 |
| H  | -0.817794 | -4.348461 | -0.681733 |
| H  | -1.271830 | -3.704912 | -2.233075 |
| H  | -4.205237 | 0.994994  | -1.730009 |
| H  | -2.769885 | 0.719885  | -2.680180 |
| H  | -2.572634 | 2.953893  | -2.233075 |
| H  | -3.356981 | 2.882461  | -0.681733 |
| H  | -4.174775 | 1.466001  | 0.681733  |
| H  | -3.844463 | 0.751020  | 2.233075  |
| H  | -2.964309 | 3.144345  | 1.730009  |
| H  | -2.008381 | 2.038848  | 2.680180  |
| H  | 4.174775  | 1.466001  | -0.681733 |
| H  | 3.844463  | 0.751020  | -2.233075 |
| H  | 2.964309  | 3.144345  | -1.730009 |
| H  | 2.008381  | 2.038848  | -2.680180 |
| H  | 4.205237  | 0.994994  | 1.730009  |
| H  | 2.769885  | 0.719885  | 2.680180  |
| H  | 3.356981  | 2.882461  | 0.681733  |
| H  | 2.572634  | 2.953893  | 2.233075  |
| Ga | 0.000000  | 0.000000  | 0.000000  |

---

Dp-In<sup>+</sup>

Energy = -1350.35778049

---

| Atom | X         | Y         | Z         |
|------|-----------|-----------|-----------|
| C    | 1.278422  | 2.515277  | 0.618877  |
| C    | 1.182424  | 2.465358  | -0.781593 |
| C    | -0.093098 | 2.556073  | -1.359515 |
| C    | -1.278422 | 2.515277  | -0.618877 |
| C    | -1.182424 | 2.465358  | 0.781593  |
| C    | 0.093098  | 2.556073  | 1.359515  |
| C    | 2.726275  | -0.208670 | 0.781593  |
| C    | 2.817505  | -0.150492 | -0.618877 |
| C    | 2.260173  | -1.197411 | -1.359515 |
| C    | 1.543851  | -2.256689 | -0.781593 |
| C    | 1.539082  | -2.364784 | 0.618877  |
| C    | 2.167075  | -1.358662 | 1.359515  |
| C    | -1.543851 | -2.256689 | 0.781593  |
| C    | -1.539082 | -2.364784 | -0.618877 |
| C    | -2.167075 | -1.358662 | -1.359515 |
| C    | -2.726275 | -0.208670 | -0.781593 |
| C    | -2.817505 | -0.150492 | 0.618877  |
| C    | -2.260173 | -1.197411 | 1.359515  |

|   |           |           |           |
|---|-----------|-----------|-----------|
| C | 0.759828  | -3.459424 | 1.301516  |
| C | -0.729157 | -3.166488 | 1.672930  |
| C | 0.729157  | -3.166488 | -1.672930 |
| C | -0.759828 | -3.459424 | -1.301516 |
| C | -3.106837 | 0.951776  | -1.672930 |
| C | -2.616035 | 2.387743  | -1.301516 |
| C | -3.375863 | 1.071681  | 1.301516  |
| C | -2.377681 | 2.214712  | 1.672930  |
| C | 3.375863  | 1.071681  | -1.301516 |
| C | 2.377681  | 2.214712  | -1.672930 |
| C | 3.106837  | 0.951776  | 1.672930  |
| C | 2.616035  | 2.387743  | 1.301516  |
| H | -0.166345 | 2.544666  | -2.443561 |
| H | 0.166345  | 2.544666  | 2.443561  |
| H | 2.286918  | -1.128274 | -2.443561 |
| H | 2.120573  | -1.416392 | 2.443561  |
| H | -2.120573 | -1.416392 | -2.443561 |
| H | -2.286918 | -1.128274 | 2.443561  |
| H | 0.809595  | -4.355387 | 0.682549  |
| H | 1.264403  | -3.718139 | 2.235132  |
| H | -0.748862 | -2.732303 | 2.674612  |
| H | -1.229275 | -4.136842 | 1.762599  |
| H | 1.229275  | -4.136842 | -1.762599 |

|    |           |           |           |
|----|-----------|-----------|-----------|
| H  | 0.748862  | -2.732303 | -2.674612 |
| H  | -0.809595 | -4.355387 | -0.682549 |
| H  | -1.264403 | -3.718139 | -2.235132 |
| H  | -4.197248 | 1.003838  | -1.762599 |
| H  | -2.740674 | 0.717618  | -2.674612 |
| H  | -2.587801 | 2.954075  | -2.235132 |
| H  | -3.367079 | 2.878823  | -0.682549 |
| H  | -4.176673 | 1.476564  | 0.682549  |
| H  | -3.852204 | 0.764064  | 2.235132  |
| H  | -2.967973 | 3.133004  | 1.762599  |
| H  | -1.991813 | 2.014685  | 2.674612  |
| H  | 4.176673  | 1.476564  | -0.682549 |
| H  | 3.852204  | 0.764064  | -2.235132 |
| H  | 2.967973  | 3.133004  | -1.762599 |
| H  | 1.991813  | 2.014685  | -2.674612 |
| H  | 4.197248  | 1.003838  | 1.762599  |
| H  | 2.740674  | 0.717618  | 2.674612  |
| H  | 3.367079  | 2.878823  | 0.682549  |
| H  | 2.587801  | 2.954075  | 2.235132  |
| In | 0.000000  | 0.000000  | 0.000000  |

---

Dp-Tl<sup>+</sup>

Energy = -1332.73674592

---

| Atom | X         | Y         | Z         |
|------|-----------|-----------|-----------|
| C    | 1.278201  | 2.526389  | 0.620352  |
| C    | 1.183991  | 2.482412  | -0.781143 |
| C    | -0.091320 | 2.575466  | -1.360423 |
| C    | -1.278201 | 2.526389  | -0.620352 |
| C    | -1.183991 | 2.482412  | 0.781143  |
| C    | 0.091320  | 2.575466  | 1.360423  |
| C    | 2.741827  | -0.215840 | 0.781143  |
| C    | 2.827017  | -0.156240 | -0.620352 |
| C    | 2.276079  | -1.208648 | -1.360423 |
| C    | 1.557836  | -2.266572 | -0.781143 |
| C    | 1.548816  | -2.370149 | 0.620352  |
| C    | 2.184759  | -1.366818 | 1.360423  |
| C    | -1.557836 | -2.266572 | 0.781143  |
| C    | -1.548816 | -2.370149 | -0.620352 |
| C    | -2.184759 | -1.366818 | -1.360423 |
| C    | -2.741827 | -0.215840 | -0.781143 |
| C    | -2.827017 | -0.156240 | 0.620352  |
| C    | -2.276079 | -1.208648 | 1.360423  |
| C    | 0.759789  | -3.459826 | 1.302078  |

|   |           |           |           |
|---|-----------|-----------|-----------|
| C | -0.733299 | -3.171160 | 1.670350  |
| C | 0.733299  | -3.171160 | -1.670350 |
| C | -0.759789 | -3.459826 | -1.302078 |
| C | -3.112954 | 0.950525  | -1.670350 |
| C | -2.616403 | 2.387909  | -1.302078 |
| C | -3.376191 | 1.071917  | 1.302078  |
| C | -2.379656 | 2.220635  | 1.670350  |
| C | 3.376191  | 1.071917  | -1.302078 |
| C | 2.379656  | 2.220635  | -1.670350 |
| C | 3.112954  | 0.950525  | 1.670350  |
| C | 2.616403  | 2.387909  | 1.302078  |
| H | -0.163815 | 2.567065  | -2.444674 |
| H | 0.163815  | 2.567065  | 2.444674  |
| H | 2.305051  | -1.141664 | -2.444674 |
| H | 2.141236  | -1.425401 | 2.444674  |
| H | -2.141236 | -1.425401 | -2.444674 |
| H | -2.305051 | -1.141664 | 2.444674  |
| H | 0.810900  | -4.357061 | 0.684980  |
| H | 1.259214  | -3.718367 | 2.238564  |
| H | -0.755539 | -2.738092 | 2.672533  |
| H | -1.225753 | -4.145388 | 1.760493  |
| H | 1.225753  | -4.145388 | -1.760493 |
| H | 0.755539  | -2.738092 | -2.672533 |

|    |           |           |           |
|----|-----------|-----------|-----------|
| H  | -0.810900 | -4.357061 | -0.684980 |
| H  | -1.259214 | -3.718367 | -2.238564 |
| H  | -4.202887 | 1.011161  | -1.760493 |
| H  | -2.749027 | 0.714730  | -2.672533 |
| H  | -2.590593 | 2.949695  | -2.238564 |
| H  | -3.367876 | 2.880791  | -0.684980 |
| H  | -4.178776 | 1.476270  | 0.684980  |
| H  | -3.849807 | 0.768672  | 2.238564  |
| H  | -2.977135 | 3.134227  | 1.760493  |
| H  | -1.993488 | 2.023362  | 2.672533  |
| H  | 4.178776  | 1.476270  | -0.684980 |
| H  | 3.849807  | 0.768672  | -2.238564 |
| H  | 2.977135  | 3.134227  | -1.760493 |
| H  | 1.993488  | 2.023362  | -2.672533 |
| H  | 4.202887  | 1.011161  | 1.760493  |
| H  | 2.749027  | 0.714730  | 2.672533  |
| H  | 3.367876  | 2.880791  | 0.684980  |
| H  | 2.590593  | 2.949695  | 2.238564  |
| Tl | 0.000000  | 0.000000  | 0.000000  |

---

Dp-Ge<sup>2+</sup>

Energy = -3236.62933054

---

| Atom | X         | Y         | Z         |
|------|-----------|-----------|-----------|
| C    | 1.277920  | 2.406269  | 0.620516  |
| C    | 1.184190  | 2.361980  | -0.783117 |
| C    | -0.092757 | 2.390246  | -1.364309 |
| C    | -1.277920 | 2.406269  | -0.620516 |
| C    | -1.184190 | 2.361980  | 0.783117  |
| C    | 0.092757  | 2.390246  | 1.364309  |
| C    | 2.637630  | -0.155451 | 0.783117  |
| C    | 2.722850  | -0.096423 | -0.620516 |
| C    | 2.116392  | -1.114793 | -1.364309 |
| C    | 1.453440  | -2.206528 | -0.783117 |
| C    | 1.444930  | -2.309846 | 0.620516  |
| C    | 2.023635  | -1.275453 | 1.364309  |
| C    | -1.453440 | -2.206528 | 0.783117  |
| C    | -1.444930 | -2.309846 | -0.620516 |
| C    | -2.023635 | -1.275453 | -1.364309 |
| C    | -2.637630 | -0.155451 | -0.783117 |
| C    | -2.722850 | -0.096423 | 0.620516  |
| C    | -2.116392 | -1.114793 | 1.364309  |
| C    | 0.756902  | -3.450090 | 1.307951  |
| C    | -0.734938 | -3.187341 | 1.663255  |



|   |           |           |           |
|---|-----------|-----------|-----------|
| C | 0.734938  | -3.187341 | -1.663255 |
| C | -0.756902 | -3.450090 | -1.307951 |
| C | -3.127787 | 0.957196  | -1.663255 |
| C | -2.609414 | 2.380541  | -1.307951 |
| C | -3.366316 | 1.069549  | 1.307951  |
| C | -2.392849 | 2.230145  | 1.663255  |
| C | 3.366316  | 1.069549  | -1.307951 |
| C | 2.392849  | 2.230145  | -1.663255 |
| C | 3.127787  | 0.957196  | 1.663255  |
| C | 2.609414  | 2.380541  | 1.307951  |
| H | -0.164259 | 2.382017  | -2.448121 |
| H | 0.164259  | 2.382017  | 2.448121  |
| H | 2.145016  | -1.048756 | -2.448121 |
| H | 1.980757  | -1.333261 | 2.448121  |
| H | -1.980757 | -1.333261 | -2.448121 |
| H | -2.145016 | -1.048756 | 2.448121  |
| H | 0.842168  | -4.341018 | 0.686815  |
| H | 1.282709  | -3.678442 | 2.236371  |
| H | -0.796700 | -2.826687 | 2.691006  |
| H | -1.262009 | -4.146168 | 1.650764  |
| H | 1.262009  | -4.146168 | -1.650764 |
| H | 0.796700  | -2.826687 | -2.691006 |
| H | -0.842168 | -4.341018 | -0.686815 |

|    |           |           |           |
|----|-----------|-----------|-----------|
| H  | -1.282709 | -3.678442 | -2.236371 |
| H  | -4.221691 | 0.980153  | -1.650764 |
| H  | -2.846332 | 0.723381  | -2.691006 |
| H  | -2.544269 | 2.950080  | -2.236371 |
| H  | -3.338348 | 2.899847  | -0.686815 |
| H  | -4.180515 | 1.441170  | 0.686815  |
| H  | -3.826979 | 0.728362  | 2.236371  |
| H  | -2.959683 | 3.166016  | 1.650764  |
| H  | -2.049633 | 2.103306  | 2.691006  |
| H  | 4.180515  | 1.441170  | -0.686815 |
| H  | 3.826979  | 0.728362  | -2.236371 |
| H  | 2.959683  | 3.166016  | -1.650764 |
| H  | 2.049633  | 2.103306  | -2.691006 |
| H  | 4.221691  | 0.980153  | 1.650764  |
| H  | 2.846332  | 0.723381  | 2.691006  |
| H  | 3.338348  | 2.899847  | 0.686815  |
| H  | 2.544269  | 2.950080  | 2.236371  |
| Ge | 0.000000  | 0.000000  | 0.000000  |

-----

Dp-Sn<sup>2+</sup>

Energy = -1374.22042148

-----

| Atom | X         | Y         | Z         |
|------|-----------|-----------|-----------|
| C    | 1.281099  | 2.457791  | 0.622770  |
| C    | 1.187963  | 2.414419  | -0.782576 |
| C    | -0.091286 | 2.472438  | -1.364254 |
| C    | -1.281099 | 2.457791  | -0.622770 |
| C    | -1.187963 | 2.414419  | 0.782576  |
| C    | 0.091286  | 2.472438  | 1.364254  |
| C    | 2.684930  | -0.178403 | 0.782576  |
| C    | 2.769059  | -0.119431 | -0.622770 |
| C    | 2.186837  | -1.157163 | -1.364254 |
| C    | 1.496966  | -2.236016 | -0.782576 |
| C    | 1.487960  | -2.338360 | 0.622770  |
| C    | 2.095551  | -1.315275 | 1.364254  |
| C    | -1.496966 | -2.236016 | 0.782576  |
| C    | -1.487960 | -2.338360 | -0.622770 |
| C    | -2.095551 | -1.315275 | -1.364254 |
| C    | -2.684930 | -0.178403 | -0.782576 |
| C    | -2.769059 | -0.119431 | 0.622770  |
| C    | -2.186837 | -1.157163 | 1.364254  |
| C    | 0.758259  | -3.459627 | 1.307948  |
| C    | -0.736008 | -3.189262 | 1.665970  |
| C    | 0.736008  | -3.189262 | -1.665970 |

|   |           |           |           |
|---|-----------|-----------|-----------|
| C | -0.758259 | -3.459627 | -1.307948 |
| C | -3.129986 | 0.957229  | -1.665970 |
| C | -2.616995 | 2.386485  | -1.307948 |
| C | -3.375254 | 1.073142  | 1.307948  |
| C | -2.393978 | 2.232033  | 1.665970  |
| C | 3.375254  | 1.073142  | -1.307948 |
| C | 2.393978  | 2.232033  | -1.665970 |
| C | 3.129986  | 0.957229  | 1.665970  |
| C | 2.616995  | 2.386485  | 1.307948  |
| H | -0.161547 | 2.473219  | -2.448416 |
| H | 0.161547  | 2.473219  | 2.448416  |
| H | 2.222644  | -1.096706 | -2.448416 |
| H | 2.061097  | -1.376513 | 2.448416  |
| H | -2.061097 | -1.376513 | -2.448416 |
| H | -2.222644 | -1.096706 | 2.448416  |
| H | 0.833562  | -4.352871 | 0.688683  |
| H | 1.272252  | -3.699332 | 2.240423  |
| H | -0.786504 | -2.806841 | 2.686739  |
| H | -1.249756 | -4.155438 | 1.686549  |
| H | 1.249756  | -4.155438 | -1.686549 |
| H | 0.786504  | -2.806841 | -2.686739 |
| H | -0.833562 | -4.352871 | -0.688683 |
| H | -1.272252 | -3.699332 | -2.240423 |

|    |           |          |           |
|----|-----------|----------|-----------|
| H  | -4.223592 | 0.995399 | -1.686549 |
| H  | -2.824048 | 0.722288 | -2.686739 |
| H  | -2.567589 | 2.951469 | -2.240423 |
| H  | -3.352916 | 2.898321 | -0.688683 |
| H  | -4.186478 | 1.454550 | 0.688683  |
| H  | -3.839841 | 0.747863 | 2.240423  |
| H  | -2.973837 | 3.160039 | 1.686549  |
| H  | -2.037544 | 2.084553 | 2.686739  |
| H  | 4.186478  | 1.454550 | -0.688683 |
| H  | 3.839841  | 0.747863 | -2.240423 |
| H  | 2.973837  | 3.160039 | -1.686549 |
| H  | 2.037544  | 2.084553 | -2.686739 |
| H  | 4.223592  | 0.995399 | 1.686549  |
| H  | 2.824048  | 0.722288 | 2.686739  |
| H  | 3.352916  | 2.898321 | 0.688683  |
| H  | 2.567589  | 2.951469 | 2.240423  |
| Sn | 0.000000  | 0.000000 | 0.000000  |

-----  
Dp-Pb<sup>2+</sup>

Energy = -1352.79578915  
-----

| Atom | X | Y | Z |
|------|---|---|---|
|------|---|---|---|

---

|   |           |           |           |
|---|-----------|-----------|-----------|
| C | 1.281347  | 2.476122  | 0.624579  |
| C | 1.189629  | 2.435877  | -0.781900 |
| C | -0.089578 | 2.503058  | -1.365015 |
| C | -1.281347 | 2.476122  | -0.624579 |
| C | -1.189629 | 2.435877  | 0.781900  |
| C | 0.089578  | 2.503058  | 1.365015  |
| C | 2.704346  | -0.187689 | 0.781900  |
| C | 2.785058  | -0.128381 | -0.624579 |
| C | 2.212501  | -1.173953 | -1.365015 |
| C | 1.514717  | -2.248188 | -0.781900 |
| C | 1.503710  | -2.347740 | 0.624579  |
| C | 2.122923  | -1.329105 | 1.365015  |
| C | -1.514717 | -2.248188 | 0.781900  |
| C | -1.503710 | -2.347740 | -0.624579 |
| C | -2.122923 | -1.329105 | -1.365015 |
| C | -2.704346 | -0.187689 | -0.781900 |
| C | -2.785058 | -0.128381 | 0.624579  |
| C | -2.212501 | -1.173953 | 1.365015  |
| C | 0.758974  | -3.461906 | 1.308534  |
| C | -0.738978 | -3.193222 | 1.664046  |
| C | 0.738978  | -3.193222 | -1.664046 |
| C | -0.758974 | -3.461906 | -1.308534 |

|   |           |           |           |
|---|-----------|-----------|-----------|
| C | -3.134900 | 0.956638  | -1.664046 |
| C | -2.618611 | 2.388243  | -1.308534 |
| C | -3.377585 | 1.073662  | 1.308534  |
| C | -2.395923 | 2.236584  | 1.664046  |
| C | 3.377585  | 1.073662  | -1.308534 |
| C | 2.395923  | 2.236584  | -1.664046 |
| C | 3.134900  | 0.956638  | 1.664046  |
| C | 2.618611  | 2.388243  | 1.308534  |
| H | -0.158803 | 2.509695  | -2.449341 |
| H | 0.158803  | 2.509695  | 2.449341  |
| H | 2.252861  | -1.117320 | -2.449341 |
| H | 2.094058  | -1.392375 | 2.449341  |
| H | -2.094058 | -1.392375 | -2.449341 |
| H | -2.252861 | -1.117320 | 2.449341  |
| H | 0.833590  | -4.356542 | 0.691120  |
| H | 1.266555  | -3.703468 | 2.244111  |
| H | -0.789640 | -2.808338 | 2.683985  |
| H | -1.244705 | -4.163522 | 1.690090  |
| H | 1.244705  | -4.163522 | -1.690090 |
| H | 0.789640  | -2.808338 | -2.683985 |
| H | -0.833590 | -4.356542 | -0.691120 |
| H | -1.266555 | -3.703468 | -2.244111 |
| H | -4.228069 | 1.003815  | -1.690090 |

|    |           |          |           |
|----|-----------|----------|-----------|
| H  | -2.826912 | 0.720321 | -2.683985 |
| H  | -2.574020 | 2.948603 | -2.244111 |
| H  | -3.356081 | 2.900182 | -0.691120 |
| H  | -4.189672 | 1.456361 | 0.691120  |
| H  | -3.840575 | 0.754865 | 2.244111  |
| H  | -2.983364 | 3.159707 | 1.690090  |
| H  | -2.037273 | 2.088017 | 2.683985  |
| H  | 4.189672  | 1.456361 | -0.691120 |
| H  | 3.840575  | 0.754865 | -2.244111 |
| H  | 2.983364  | 3.159707 | -1.690090 |
| H  | 2.037273  | 2.088017 | -2.683985 |
| H  | 4.228069  | 1.003815 | 1.690090  |
| H  | 2.826912  | 0.720321 | 2.683985  |
| H  | 3.356081  | 2.900182 | 0.691120  |
| H  | 2.574020  | 2.948603 | 2.244111  |
| Pb | 0.000000  | 0.000000 | 0.000000  |

-----

Dp-As<sup>3+</sup>

Energy = -3394.93945427

-----

| Atom | X | Y | Z |
|------|---|---|---|
|------|---|---|---|

-----



|   |           |           |           |
|---|-----------|-----------|-----------|
| C | 1.281371  | 2.377411  | 0.622867  |
| C | 1.186547  | 2.327723  | -0.786676 |
| C | -0.094846 | 2.325017  | -1.369128 |
| C | -1.281371 | 2.377411  | -0.622867 |
| C | -1.186547 | 2.327723  | 0.786676  |
| C | 0.094846  | 2.325017  | 1.369128  |
| C | 2.609141  | -0.136282 | 0.786676  |
| C | 2.699584  | -0.079006 | -0.622867 |
| C | 2.060947  | -1.080369 | -1.369128 |
| C | 1.422594  | -2.191441 | -0.786676 |
| C | 1.418213  | -2.298405 | 0.622867  |
| C | 1.966101  | -1.244648 | 1.369128  |
| C | -1.422594 | -2.191441 | 0.786676  |
| C | -1.418213 | -2.298405 | -0.622867 |
| C | -1.966101 | -1.244648 | -1.369128 |
| C | -2.609141 | -0.136282 | -0.786676 |
| C | -2.699584 | -0.079006 | 0.622867  |
| C | -2.060947 | -1.080369 | 1.369128  |
| C | 0.763071  | -3.447682 | 1.308901  |
| C | -0.736585 | -3.187253 | 1.660219  |
| C | 0.736585  | -3.187253 | -1.660219 |
| C | -0.763071 | -3.447682 | -1.308901 |
| C | -3.128534 | 0.955725  | -1.660219 |

|   |           |           |           |
|---|-----------|-----------|-----------|
| C | -2.604245 | 2.384680  | -1.308901 |
| C | -3.367316 | 1.063002  | 1.308901  |
| C | -2.391949 | 2.231528  | 1.660219  |
| C | 3.367316  | 1.063002  | -1.308901 |
| C | 2.391949  | 2.231528  | -1.660219 |
| C | 3.128534  | 0.955725  | 1.660219  |
| C | 2.604245  | 2.384680  | 1.308901  |
| H | -0.166160 | 2.304251  | -2.453131 |
| H | 0.166160  | 2.304251  | 2.453131  |
| H | 2.078619  | -1.008227 | -2.453131 |
| H | 1.912460  | -1.296024 | 2.453131  |
| H | -1.912460 | -1.296024 | -2.453131 |
| H | -2.078619 | -1.008227 | 2.453131  |
| H | 0.855657  | -4.339891 | 0.691569  |
| H | 1.286450  | -3.661843 | 2.242141  |
| H | -0.813837 | -2.859153 | 2.697092  |
| H | -1.265673 | -4.144341 | 1.605564  |
| H | 1.265673  | -4.144341 | -1.605564 |
| H | 0.813837  | -2.859153 | -2.697092 |
| H | -0.855657 | -4.339891 | -0.691569 |
| H | -1.286450 | -3.661843 | -2.242141 |
| H | -4.221941 | 0.976066  | -1.605564 |
| H | -2.883018 | 0.724773  | -2.697092 |

|    |           |          |           |
|----|-----------|----------|-----------|
| H  | -2.528024 | 2.945020 | -2.242141 |
| H  | -3.330628 | 2.910966 | -0.691569 |
| H  | -4.186284 | 1.428925 | 0.691569  |
| H  | -3.814474 | 0.716823 | 2.242141  |
| H  | -2.956268 | 3.168275 | 1.605564  |
| H  | -2.069180 | 2.134380 | 2.697092  |
| H  | 4.186284  | 1.428925 | -0.691569 |
| H  | 3.814474  | 0.716823 | -2.242141 |
| H  | 2.956268  | 3.168275 | -1.605564 |
| H  | 2.069180  | 2.134380 | -2.697092 |
| H  | 4.221941  | 0.976066 | 1.605564  |
| H  | 2.883018  | 0.724773 | 2.697092  |
| H  | 3.330628  | 2.910966 | 0.691569  |
| H  | 2.528024  | 2.945020 | 2.242141  |
| As | 0.000000  | 0.000000 | 0.000000  |

-----

Dp-Sb<sup>3+</sup>

Energy = -1399.65530292

-----

| Atom | X        | Y        | Z        |
|------|----------|----------|----------|
| C    | 1.285429 | 2.420011 | 0.625701 |

-----

|   |           |           |           |
|---|-----------|-----------|-----------|
| C | 1.192441  | 2.374936  | -0.785101 |
| C | -0.091927 | 2.405459  | -1.369056 |
| C | -1.285429 | 2.420011  | -0.625701 |
| C | -1.192441 | 2.374936  | 0.785101  |
| C | 0.091927  | 2.405459  | 1.369056  |
| C | 2.652975  | -0.154784 | 0.785101  |
| C | 2.738506  | -0.096791 | -0.625701 |
| C | 2.129152  | -1.123119 | -1.369056 |
| C | 1.460535  | -2.220152 | -0.785101 |
| C | 1.453077  | -2.323220 | 0.625701  |
| C | 2.037225  | -1.282340 | 1.369056  |
| C | -1.460535 | -2.220152 | 0.785101  |
| C | -1.453077 | -2.323220 | -0.625701 |
| C | -2.037225 | -1.282340 | -1.369056 |
| C | -2.652975 | -0.154784 | -0.785101 |
| C | -2.738506 | -0.096791 | 0.625701  |
| C | -2.129152 | -1.123119 | 1.369056  |
| C | 0.760881  | -3.459144 | 1.311782  |
| C | -0.738980 | -3.197603 | 1.662449  |
| C | 0.738980  | -3.197603 | -1.662449 |
| C | -0.760881 | -3.459144 | -1.311782 |
| C | -3.138695 | 0.958826  | -1.662449 |
| C | -2.615266 | 2.388515  | -1.311782 |

|   |           |           |           |
|---|-----------|-----------|-----------|
| C | -3.376148 | 1.070630  | 1.311782  |
| C | -2.399715 | 2.238777  | 1.662449  |
| C | 3.376148  | 1.070630  | -1.311782 |
| C | 2.399715  | 2.238777  | -1.662449 |
| C | 3.138695  | 0.958826  | 1.662449  |
| C | 2.615266  | 2.388515  | 1.311782  |
| H | -0.161013 | 2.404605  | -2.453688 |
| H | 0.161013  | 2.404605  | 2.453688  |
| H | 2.162956  | -1.062861 | -2.453688 |
| H | 2.001943  | -1.341744 | 2.453688  |
| H | -2.001943 | -1.341744 | -2.453688 |
| H | -2.162956 | -1.062861 | 2.453688  |
| H | 0.850353  | -4.352282 | 0.694810  |
| H | 1.277728  | -3.683485 | 2.246410  |
| H | -0.809659 | -2.851980 | 2.694516  |
| H | -1.260374 | -4.159987 | 1.634786  |
| H | 1.260374  | -4.159987 | -1.634786 |
| H | 0.809659  | -2.851980 | -2.694516 |
| H | -0.850353 | -4.352282 | -0.694810 |
| H | -1.277728 | -3.683485 | -2.246410 |
| H | -4.232841 | 0.988477  | -1.634786 |
| H | -2.874717 | 0.724805  | -2.694516 |
| H | -2.551127 | 2.948287  | -2.246410 |

|    |           |          |           |
|----|-----------|----------|-----------|
| H  | -3.344011 | 2.912568 | -0.694810 |
| H  | -4.194363 | 1.439714 | 0.694810  |
| H  | -3.828855 | 0.735198 | 2.246410  |
| H  | -2.972467 | 3.171509 | 1.634786  |
| H  | -2.065058 | 2.127175 | 2.694516  |
| H  | 4.194363  | 1.439714 | -0.694810 |
| H  | 3.828855  | 0.735198 | -2.246410 |
| H  | 2.972467  | 3.171509 | -1.634786 |
| H  | 2.065058  | 2.127175 | -2.694516 |
| H  | 4.232841  | 0.988477 | 1.634786  |
| H  | 2.874717  | 0.724805 | 2.694516  |
| H  | 3.344011  | 2.912568 | 0.694810  |
| H  | 2.551127  | 2.948287 | 2.246410  |
| Sb | 0.000000  | 0.000000 | 0.000000  |

---

Dp-Bi<sup>3+</sup>

Energy = -1374.05481316

---

| Atom | X        | Y        | Z         |
|------|----------|----------|-----------|
| C    | 1.285270 | 2.434916 | 0.627450  |
| C    | 1.193864 | 2.392649 | -0.783783 |

|   |           |           |           |
|---|-----------|-----------|-----------|
| C | -0.089896 | 2.434757  | -1.369179 |
| C | -1.285270 | 2.434916  | -0.627450 |
| C | -1.193864 | 2.392649  | 0.783783  |
| C | 0.089896  | 2.434757  | 1.369179  |
| C | 2.669027  | -0.162408 | 0.783783  |
| C | 2.751334  | -0.104382 | -0.627450 |
| C | 2.153509  | -1.139526 | -1.369179 |
| C | 1.475163  | -2.230241 | -0.783783 |
| C | 1.466064  | -2.330534 | 0.627450  |
| C | 2.063613  | -1.295231 | 1.369179  |
| C | -1.475163 | -2.230241 | 0.783783  |
| C | -1.466064 | -2.330534 | -0.627450 |
| C | -2.063613 | -1.295231 | -1.369179 |
| C | -2.669027 | -0.162408 | -0.783783 |
| C | -2.751334 | -0.104382 | 0.627450  |
| C | -2.153509 | -1.139526 | 1.369179  |
| C | 0.761012  | -3.461222 | 1.312870  |
| C | -0.741534 | -3.202220 | 1.660324  |
| C | 0.741534  | -3.202220 | -1.660324 |
| C | -0.761012 | -3.461222 | -1.312870 |
| C | -3.143971 | 0.958922  | -1.660324 |
| C | -2.617000 | 2.389667  | -1.312870 |
| C | -3.378012 | 1.071555  | 1.312870  |

|   |           |           |           |
|---|-----------|-----------|-----------|
| C | -2.402436 | 2.243297  | 1.660324  |
| C | 3.378012  | 1.071555  | -1.312870 |
| C | 2.402436  | 2.243297  | -1.660324 |
| C | 3.143971  | 0.958922  | 1.660324  |
| C | 2.617000  | 2.389667  | 1.312870  |
| H | -0.157541 | 2.444049  | -2.453911 |
| H | 0.157541  | 2.444049  | 2.453911  |
| H | 2.195379  | -1.085590 | -2.453911 |
| H | 2.037838  | -1.358459 | 2.453911  |
| H | -2.037838 | -1.358459 | -2.453911 |
| H | -2.195379 | -1.085590 | 2.453911  |
| H | 0.851251  | -4.355358 | 0.697322  |
| H | 1.273040  | -3.687189 | 2.249778  |
| H | -0.813077 | -2.854760 | 2.691835  |
| H | -1.257053 | -4.167814 | 1.636837  |
| H | 1.257053  | -4.167814 | -1.636837 |
| H | 0.813077  | -2.854760 | -2.691835 |
| H | -0.851251 | -4.355358 | -0.697322 |
| H | -1.273040 | -3.687189 | -2.249778 |
| H | -4.237959 | 0.995267  | -1.636837 |
| H | -2.878833 | 0.723235  | -2.691835 |
| H | -2.556679 | 2.946079  | -2.249778 |
| H | -3.346225 | 2.914884  | -0.697322 |



|    |           |          |           |
|----|-----------|----------|-----------|
| H  | -4.197476 | 1.440474 | 0.697322  |
| H  | -3.829719 | 0.741110 | 2.249778  |
| H  | -2.980906 | 3.172547 | 1.636837  |
| H  | -2.065756 | 2.131525 | 2.691835  |
| H  | 4.197476  | 1.440474 | -0.697322 |
| H  | 3.829719  | 0.741110 | -2.249778 |
| H  | 2.980906  | 3.172547 | -1.636837 |
| H  | 2.065756  | 2.131525 | -2.691835 |
| H  | 4.237959  | 0.995267 | 1.636837  |
| H  | 2.878833  | 0.723235 | 2.691835  |
| H  | 3.346225  | 2.914884 | 0.697322  |
| H  | 2.556679  | 2.946079 | 2.249778  |
| Bi | 0.000000  | 0.000000 | 0.000000  |

-----

**Figure S2) Molecular orbital (MO) diagrams of few selected cyclophane-metal complexes showing HOMO and LUMO and percentage contribution of orbitals in the resultant MOs.**

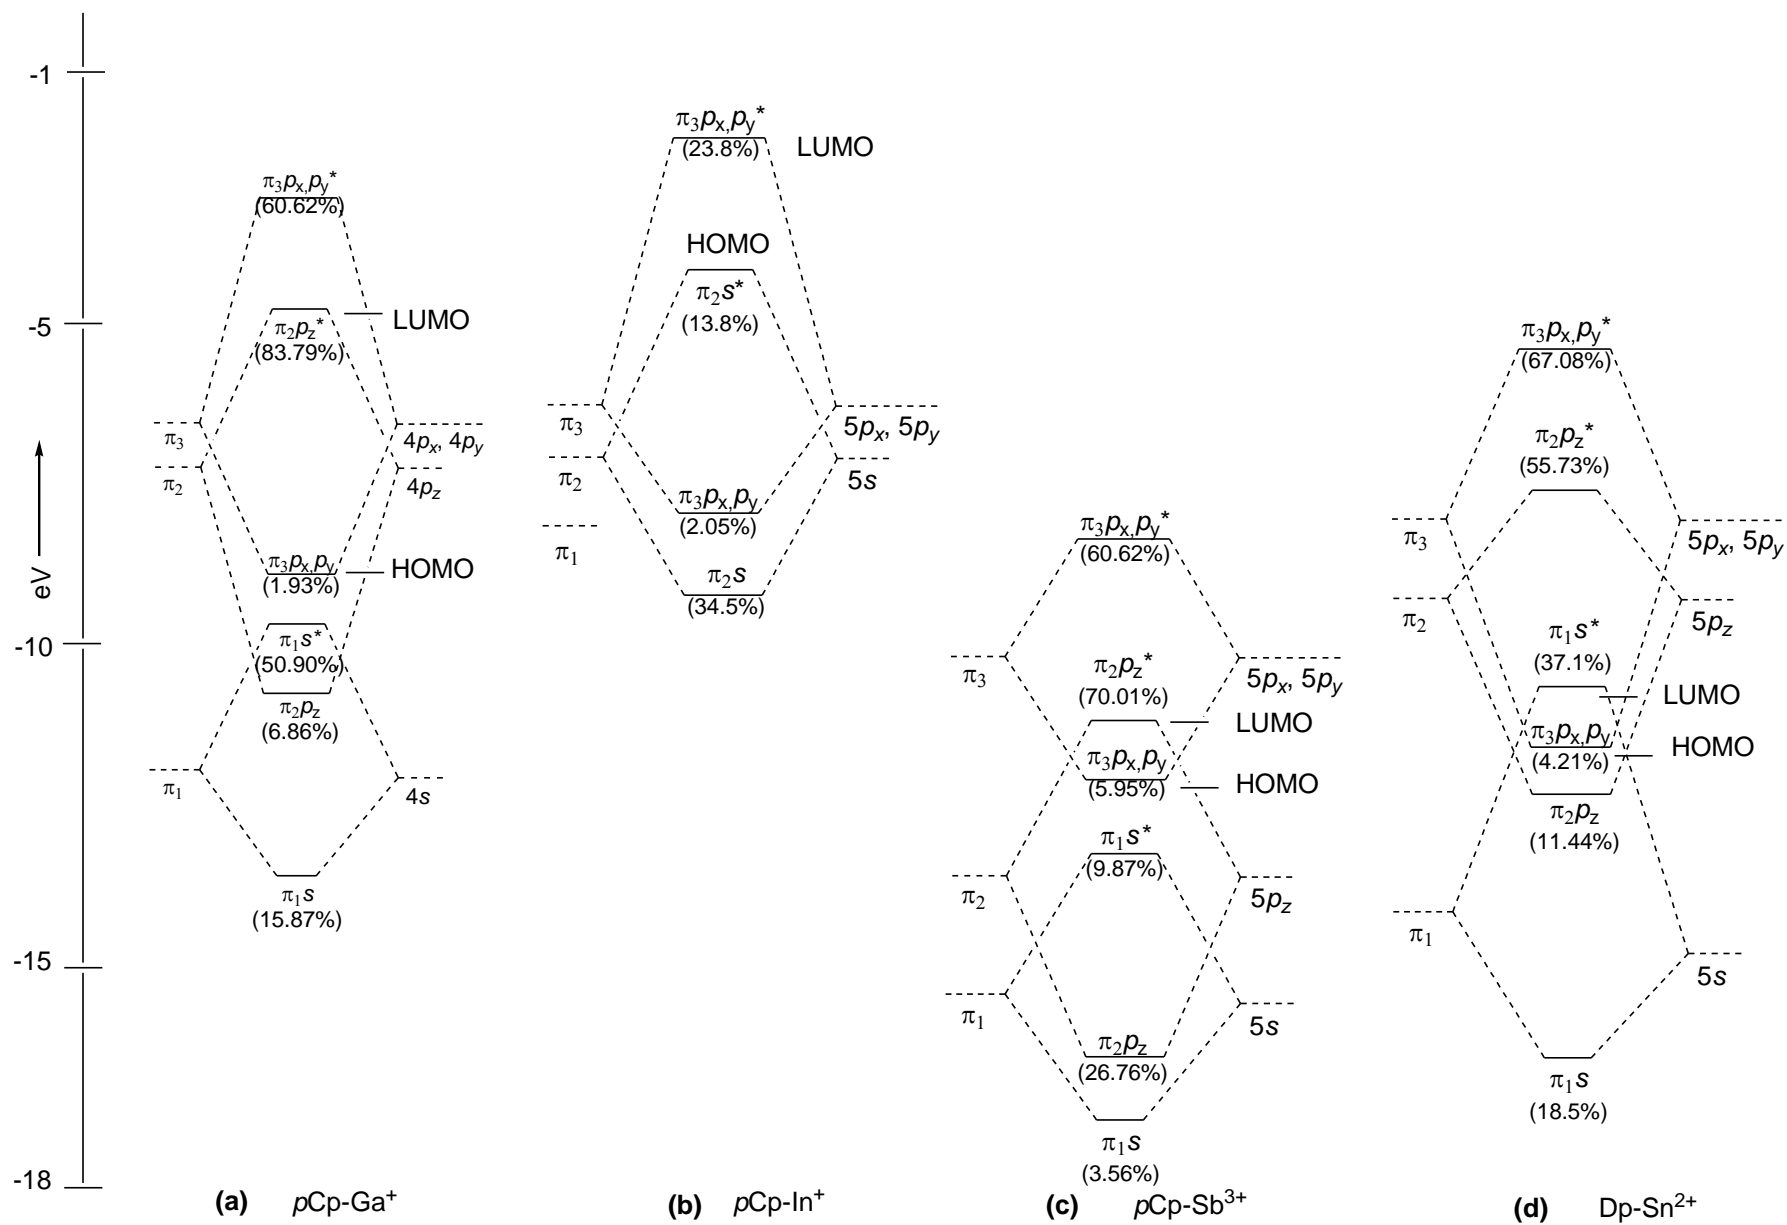

Figure S3) Iso-surfaces of MO interactions of selected  $p\text{Cp-M}^{n+}$  complexes

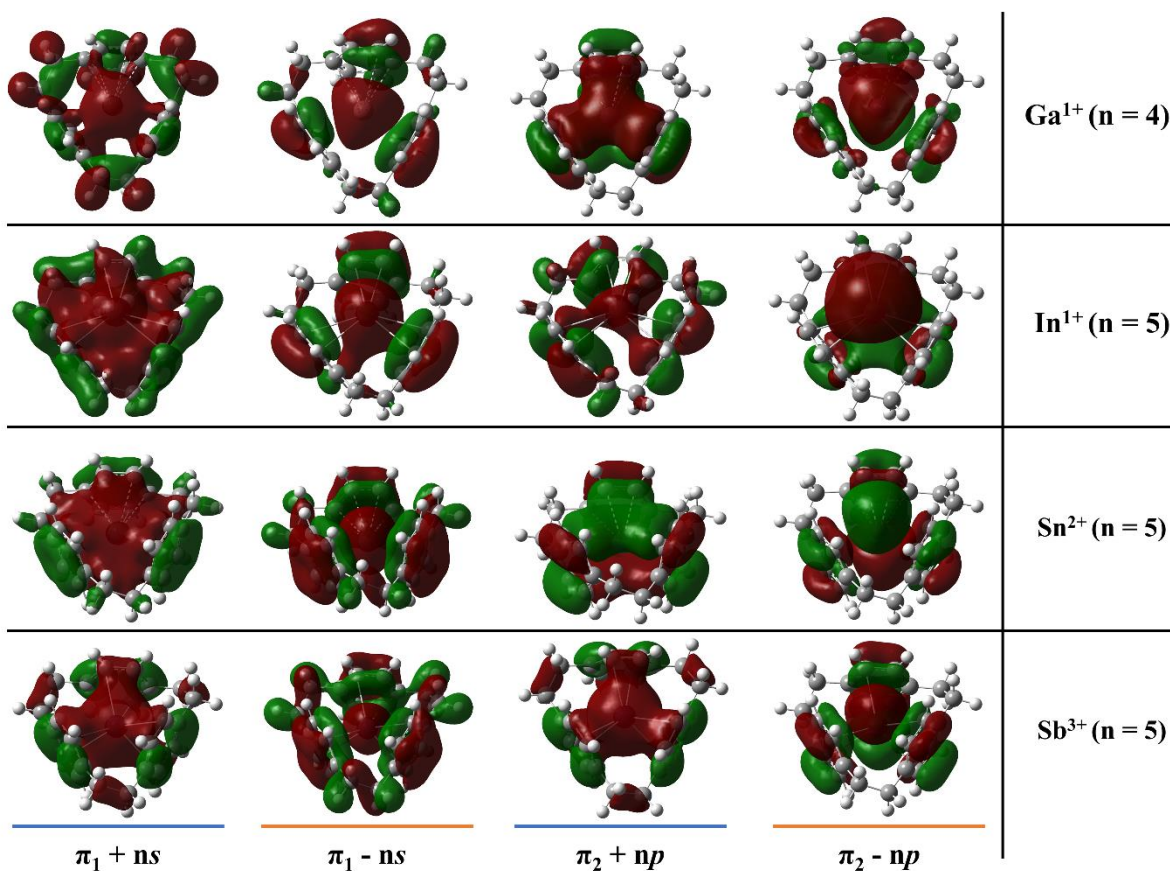

Figure S4) Iso-surfaces of MO interactions of  $\text{Dp-Sn}^{2+}$

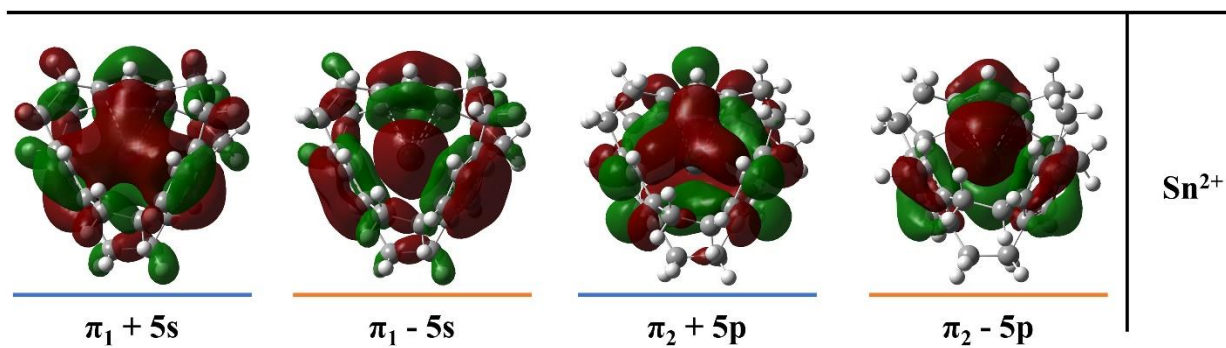

Supplement: d0ra05303a1.pdf [file d0ra05303a1.pdf]
